# Supplementary material
Source: MDPI journal article supplement (https://www.mdpi.com/2073-4441/11/4/839)
Supplement: s1 [file s1]

Supplementary Materials (S1)

**Years and Time Steps**

**Time Horizon**  
 Current Accounts Year: 1983  
 Last Year of Scenarios: 2017

**Time Steps per Year**  
 12  
 Add Leap Days?

**Time Step Boundary**  
 Based on calendar month  
 All time steps are equal length  
 Set time step length manually

**Water Year Start**  
 October

| #  | Title    | Abbrev. | Length | Begins | Ends   |
|----|----------|---------|--------|--------|--------|
| 1  | October  | Oct     | 31     | Oct 1  | Oct 31 |
| 2  | November | Nov     | 30     | Nov 1  | Nov 30 |
| 3  | December | Dec     | 31     | Dec 1  | Dec 31 |
| 4  | January  | Jan     | 31     | Jan 1  | Jan 31 |
| 5  | February | Feb     | 29     | Feb 1  | Feb 29 |
| 6  | March    | Mar     | 31     | Mar 1  | Mar 31 |
| 7  | April    | Apr     | 30     | Apr 1  | Apr 30 |
| 8  | May      | May     | 31     | May 1  | May 31 |
| 9  | June     | Jun     | 30     | Jun 1  | Jun 30 |
| 10 | July     | Jul     | 31     | Jul 1  | Jul 31 |

Time Step Name Format: October / Oct

The study period will run from October, 1982 to September, 2017.

Help Close

Figure S1. WEAP Model Years and Time Steps.

Table S1. Computation of Nash-Sutcliffe model efficiency coefficient (NSE)\*.

| Months                    | Oct   | Nov   | Dec  | Jan       | Feb    | Mar    | Apr   | May  | Jun       | Jul   | Aug   | Sep   | Sum    |
|---------------------------|-------|-------|------|-----------|--------|--------|-------|------|-----------|-------|-------|-------|--------|
| $Q_0$ (m <sup>3</sup> /s) | 1.15  | 2.29  | 6.03 | 15.6<br>3 | 24.06  | 20.16  | 8.88  | 5.03 | 3.59      | 3.10  | 2.32  | 1.45  | 93.69  |
| $Q_s$ (m <sup>3</sup> /s) | 1.22  | 2.05  | 5.30 | 22.1<br>0 | 36.76  | 23.34  | 12.20 | 4.61 | 4.28      | 3.97  | 1.32  | 0.80  | 117.96 |
| $(Q_s^t - Q_0^t)^2$       | 0.01  | 0.06  | 0.52 | 41.8<br>6 | 161.15 | 10.09  | 11.02 | 0.17 | 0.48      | 0.75  | 0.99  | 0.42  | 227.52 |
| $(Q_0^t - \bar{Q}_0)^2$   | 44.32 | 30.44 | 3.17 | 61.2<br>0 | 264.22 | 152.66 | 1.16  | 7.74 | 17.8<br>1 | 22.12 | 30.09 | 40.48 | 631.09 |
| NSE                       |       |       |      |           |        |        |       |      |           |       |       |       | 0.64   |

\* based on the formula; 
$$NSE = 1 - \frac{\sum_{t=1}^T (Q_s^t - Q_0^t)^2}{\sum_{t=1}^T (Q_0^t - \bar{Q}_0)^2}$$

where,  $\bar{Q}_0$  is the mean of the observed streamflow,  $Q_s^t$  and  $Q_0^t$  are simulated and observed streamflow at time t respectively.
